# Supplementary material
Source: Springer Nature journal article supplement (https://www.springermedizin.de/resource/supplementary/13020_2010_88_MOESM4_ESM.pdf/9640950)

Peak area

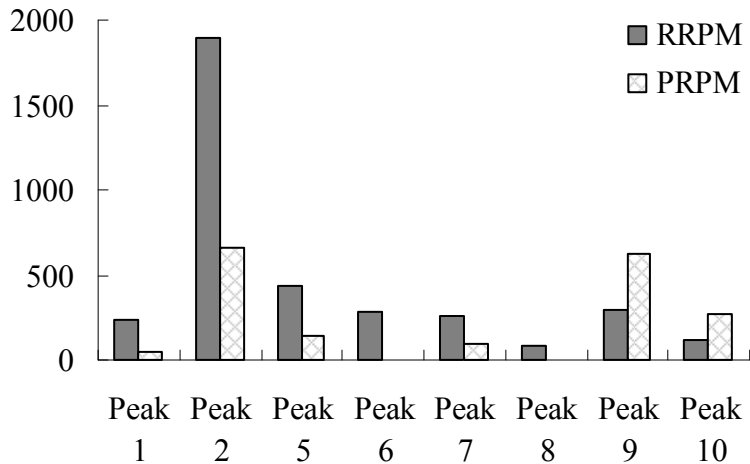

Supplement: MOESM4 [file 9640950]
